# Supplementary material for: TETyper: a bioinformatic pipeline for classifying variation and genetic contexts of transposable elements from short-read whole-genome sequencing data
Source: PubMed Central journal article supplement (PMC6412039; doi:10.1099/mgen.0.000232), 2018-11-22
Supplement: mgen-4-232-s001.pdf [file mgen-4-232-s001.pdf]

## Supplementary Methods: Description of *bla*<sub>KPC</sub> sample collection and parameters for running TETyper

To identify short-read datasets containing *bla*<sub>KPC</sub>, we queried a snapshot of all bacterial WGS datasets from the European Nucleotide Archive from December 2016, using <http://bigsi.io> (1), with *bla*<sub>KPC-2</sub> as a query sequence and a query kmer threshold of 40%. This returned 3120 results.

Metadata for these sequencing datasets was retrieved using Biopython's Entrez package. Based on this, we excluded non-Illumina datasets (n=48; 37 454, 10 PacBio, 1 Ion Torrent) and single-read datasets (n=3). A further three datasets were excluded following sequence download (only had single-read data available, n=2; unavailable for download, n=1), leaving 3066 datasets for comparison.

These 3066 paired-end Illumina datasets were run through the TETyper pipeline, with parameters according to the following example command (Tn4401b-1.fasta, struct\_profiles.txt and snp\_profiles.txt are provided in the github repository at [https://github.com/aesheppard/TE\\_Typer](https://github.com/aesheppard/TE_Typer)):

```
TETyper.py --fq1 ERR025634_1.fastq.gz --fq2 ERR025634_2.fastq.gz --outprefix ERR025634 --ref Tn4401b-1.fasta --flank_len 5 --struct_profiles struct_profiles.txt --snp_profiles snp_profiles.txt --verbosity 2 --show_region 7202-8083
```

12 of these 3066 datasets were classified as *bla*<sub>KPC</sub>-negative, as there was either no full length *bla*<sub>KPC</sub> gene present in the *de novo* assembly produced (n=4), or the *de novo* assembly step failed due to a low number of reads mapping to the Tn4401 reference (n=8). These were excluded from further processing, leaving a total of 3054 *bla*<sub>KPC</sub>-positive sequencing datasets for analysis.

For the IS26 analysis, samples were run according to the following example command (IS26.fasta is provided in the github repository and represents a trimmed version of GenBank accession X00011.1):

```
TETyper.py --fq1 PMK1_1.fq.gz --fq2 PMK1_2.fq.gz --outprefix PMK1 --ref IS26.fasta --verbosity 2 --flank_len 8
```

## References

1. Bradley P, den Bakker H, Rocha E, McVean G, Iqbal Z. Real-time search of all bacterial and viral genomic data. bioRxiv. 2017.

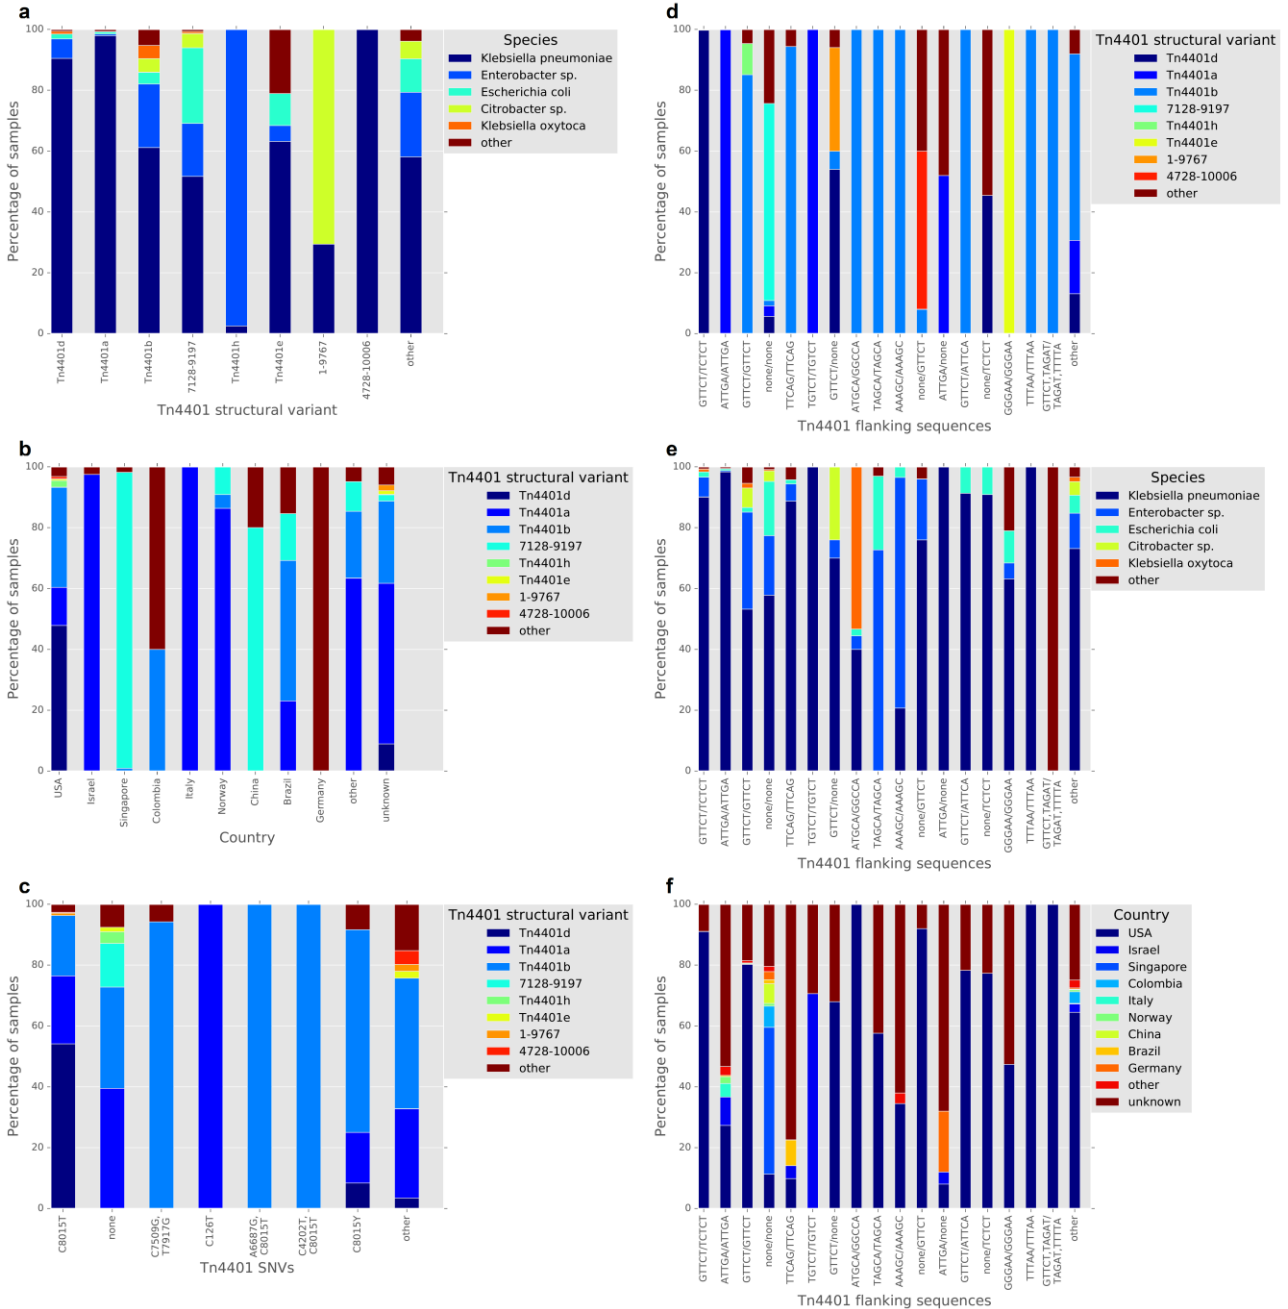

**Fig. S1:** Associations between Tn4401 structural variants, SNVs, flanking genetic contexts, host species, and countries of origin amongst a collection of 3054 *bla*<sub>KPC</sub> samples from the European Nucleotide Archive, shown as proportions. (a) Distributions of host species for different structural variants of Tn4401. (b) Distributions of Tn4401 structural variants for different countries of origin. (c) Distributions of Tn4401 structural variants for different Tn4401 SNVs. (d-f) Distributions of Tn4401 structural variants (d), host species (e) and countries of origin (f) for different Tn4401 flanking genetic contexts.

**Table S2. Validation of TETyper output for 24 *bla*<sub>KPC</sub> isolates with complete long-read assemblies available.**

| Isolate | Species                        | Assembly accession    | Tn4401 elements in long-read assembly                                     | SRA accession | Tn4401 Structure | Tn4401 SNVs                  | Left flanks (coverage)      | Right flanks (coverage)     | Agreement |
|---------|--------------------------------|-----------------------|---------------------------------------------------------------------------|---------------|------------------|------------------------------|-----------------------------|-----------------------------|-----------|
| CAV1016 | <i>Klebsiella pneumoniae</i>   | CP017934.1-CP017937.1 | GTTCT-Tn4401b-GTTCT                                                       | SRR1582858    | Tn4401b          | none                         | GTTCT (129)                 | GTTCT (95)                  | Yes       |
| CAV1042 | <i>Klebsiella pneumoniae</i>   | CP018665.1-CP018671.1 | ATATC-Tn4401b-AATAT,<br>GTTCT-Tn4401b-GTTCT                               | SRR1582861    | Tn4401b          | none                         | ATATC (73),<br>GTTCT (91)   | AATAT (69),<br>GTTCT (61)   | Yes       |
| CAV1043 | <i>Enterobacter asburiae</i>   | CP011585.1-CP011591.1 | GTTCT-Tn4401b(C8015T)-GTTCT                                               | SRR2965752    | Tn4401b          | C8015T                       | GTTCT (108)                 | GTTCT (81)                  | Yes       |
| CAV1099 | <i>Klebsiella oxytoca</i>      | CP011592.1-CP011597.1 | ATGCA-Tn4401b-GGCCA                                                       | SRR2965639    | Tn4401b          | none                         | ATGCA (107)                 | GGCCA (79)                  | Yes       |
| CAV1151 | <i>Kluyvera intermedia</i>     | CP011598.1-CP011602.1 | GTTCT-Tn4401b-GTTCT                                                       | SRR2965721    | Tn4401b          | none                         | GTTCT (102)                 | GTTCT (63)                  | Yes       |
| CAV1176 | <i>Enterobacter hormaechei</i> | CP011658.1-CP011662.1 | GTTCT-Tn4401h-GTTCT                                                       | SRR2965806    | Tn4401h          | none                         | GTTCT (104)                 | GTTCT (76)                  | Yes       |
| CAV1193 | <i>Klebsiella pneumoniae</i>   | CP013321.1-CP013326.1 | GTTCT-Tn4401b-GTTCT                                                       | SRR2965672    | Tn4401b          | none                         | GTTCT (85)                  | GTTCT (86)                  | Yes       |
| CAV1217 | <i>Klebsiella pneumoniae</i>   | CP018672.1-CP018676.1 | ATGAA-Tn4401b(C7509G,T7917G)-ATGAA,<br>ATGAA-Tn4401b(C7509G,T7917G)-ATGAA | SRR1582870    | Tn4401b          | C7509G,<br>T7917G            | ATGAA (56)                  | ATGAA (55)                  | Yes       |
| CAV1311 | <i>Enterobacter cloacae</i>    | CP011569.1-CP011572.1 | GTTCT-Tn4401h-GTTCT                                                       | SRR2965815    | Tn4401h          | none                         | GTTCT (94)                  | GTTCT (92)                  | Yes       |
| CAV1320 | <i>Klebsiella aerogenes</i>    | CP011573.1-CP011574.1 | TTGTT-Tn4401b-TTGTT                                                       | SRR2965748    | Tn4401b          | none                         | TTGTT (209)                 | TTGTT (168)                 | Yes       |
| CAV1321 | <i>Citrobacter freundii</i>    | CP011603.1-CP011612.1 | GTTCT-Tn4401b-GTTCT,<br>GTTCT-Tn4401b-GTTCT                               | SRR2965690    | Tn4401b          | none                         | GTTCT (150)                 | GTTCT (133)                 | Yes       |
| CAV1335 | <i>Klebsiella oxytoca</i>      | CP011613.1-CP011618.1 | ATGCA-Tn4401b-GGCCA                                                       | SRR2965660    | Tn4401b          | none                         | ATGCA (57)                  | GGCCA (30)                  | Yes       |
| CAV1344 | <i>Klebsiella pneumoniae</i>   | CP011619.1-CP011624.1 | GTTCT-Tn4401b-GTTCT                                                       | SRR1582875    | Tn4401b          | none                         | GTTCT (37)                  | GTTCT (29)                  | Yes       |
| CAV1374 | <i>Klebsiella oxytoca</i>      | CP011625.1-CP011636.1 | GTTCT-Tn4401b-GTTCT                                                       | SRR2965655    | Tn4401b          | none                         | GTTCT (117)                 | GTTCT (88)                  | Yes       |
| CAV1392 | <i>Klebsiella pneumoniae</i>   | CP011575.1-CP011578.1 | AGATA-Tn4401b(C8015T)-AGATA,<br>GTTCT-Tn4401b(C8015T)-GTTCT               | SRR1582895    | Tn4401b          | C8015T                       | AGATA (56),<br>GTTCT (151)  | AGATA (52),<br>GTTCT (101)  | Yes       |
| CAV1411 | <i>Enterobacter cloacae</i>    | CP011579.1-CP011581.1 | GTTCT-Tn4401h-GTTCT                                                       | SRR2965820    | Tn4401h          | none                         | GTTCT (87)                  | GTTCT (58)                  | Yes       |
| CAV1417 | <i>Klebsiella pneumoniae</i>   | CP018348.1-CP018352.1 | ATGAA-Tn4401b(T6800C,C7509G,T7917G)-<br>ATGAA                             | SRR2965682    | Tn4401b          | T6800C,<br>C7509G,<br>T7919G | ATGAA (73)                  | ATGAA (53)                  | Yes       |
| CAV1453 | <i>Klebsiella pneumoniae</i>   | CP018353.1-CP018356.1 | AATAA-Tn4401a-CTATT                                                       | SRR2965692    | Tn4401a          | none                         | AATAA(101)                  | CTATT (30)                  | Yes       |
| CAV1492 | <i>Serratia marcescens</i>     | CP011637.1-CP011642.1 | TTTTT-Tn4401b(T9663C)-TTTTT                                               | SRR2965730    | Tn4401b          | T9663C                       | TTTTT (112)                 | TTTTT (76)                  | Yes       |
| CAV1596 | <i>Klebsiella pneumoniae</i>   | CP011643.1-CP011647.1 | GTTCT-Tn4401b(C8015T)-GTTCT,<br>TATCG-Tn4401b(C8015T)-TATCG               | SRR1582868    | Tn4401b          | C8015T                       | GTTCT (157),<br>TATCG (200) | GTTCT (110),<br>TATCG (157) | Yes       |
| CAV1668 | <i>Enterobacter cloacae</i>    | CP011582.1-CP011584.1 | GTTCT-Tn4401h-GTTCT                                                       | SRR2965612    | Tn4401h          | none                         | GTTCT (144)                 | GTTCT (90)                  | Yes       |
| CAV1669 | <i>Enterobacter cloacae</i>    | CP011648.1-CP011650.1 | GTTCT-Tn4401h-GTTCT                                                       | SRR2965616    | Tn4401h          | none                         | GTTCT (103)                 | GTTCT (84)                  | Yes       |
| CAV1741 | <i>Citrobacter freundii</i>    | CP011651.1-CP011657.1 | GTTCT-Tn4401b-GTTCT,<br>GTTCT-Tn4401b-GTTCT                               | SRR2965739    | Tn4401b          | none                         | GTTCT (256)                 | GTTCT (191)                 | Yes       |
| CAV1752 | <i>Klebsiella oxytoca</i>      | CP018357.1-CP018362.1 | AACAA-Tn4401b-AACAA                                                       | SRR2965667    | Tn4401b          | none                         | AACAA (74)                  | AACAA (45)                  | Yes       |

**Table S3. IS26 elements present in PMK1 long-read assembly.**

| Contig     | Start position | End position | Length | Deletions | SNVs  | Left flank | Right flank | Flanks correctly identified by TETyper |
|------------|----------------|--------------|--------|-----------|-------|------------|-------------|----------------------------------------|
| CP008930.1 | 36476          | 37211        | 736    | 1-84      | none  |            | CGTTTTTC    | Yes                                    |
| CP008930.1 | 40738          | 41347        | 610    | 611-820   | none  | CAGCTTAC   |             | Yes                                    |
| CP008930.1 | 45939          | 45120        | 820    | none      | none  | CTTTGTGC   | AAAATAGG    | Yes                                    |
| CP008930.1 | 62346          | 63165        | 820    | none      | T107G | ATTGTTTT   | GGTCTTAA    | Yes                                    |
| CP008933.1 | 38164          | 38983        | 820    | none      | none  | AAAAATAG   | CCACATCT    | Yes                                    |
| CP008933.1 | 41989          | 41170        | 820    | none      | none  | GTCGAAGT   | TTTAAGCG    | Yes                                    |
| CP008933.1 | 43685          | 42866        | 820    | none      | none  | TTAATTAC   | AACTGGAG    | Yes                                    |
| CP008933.1 | 76011          | 75318        | 694    | 1-126     | none  |            | TTAATTAC    | Yes                                    |
| CP008933.1 | 205677         | 206496       | 820    | none      | none  | ATGTACAC   | TTCAATAT    | Yes                                    |
